# Supplementary material
Source: MDPI journal article supplement (https://www.mdpi.com/2075-4701/12/7/1126)
Supplement: s1 [file s1]

Table S1. Detailed density data as a function of temepature.

| Tm <sub>2</sub> O <sub>3</sub> |                                 | Yb <sub>2</sub> O <sub>3</sub> |                                 | Lu <sub>2</sub> O <sub>3</sub> |                                 |
|--------------------------------|---------------------------------|--------------------------------|---------------------------------|--------------------------------|---------------------------------|
| Temperature<br>(K)             | Density<br>(kg/m <sup>3</sup> ) | Temperature<br>(K)             | Density<br>(kg/m <sup>3</sup> ) | Temperature<br>(K)             | Density<br>(kg/m <sup>3</sup> ) |
| 3019                           | 8245                            | 2941                           | 8272                            | 3103                           | 8499                            |
| 3004                           | 8268                            | 2954                           | 8265                            | 3107                           | 8495                            |
| 3017                           | 8256                            | 2930                           | 8305                            | 3062                           | 8500                            |
| 2973                           | 8241                            | 2916                           | 8308                            | 3087                           | 8496                            |
| 2976                           | 8247                            | 2933                           | 8299                            | 3086                           | 8501                            |
| 2966                           | 8256                            | 2906                           | 8341                            | 3066                           | 8514                            |
| 2905                           | 8245                            | 2880                           | 8346                            | 3053                           | 8486                            |
| 2881                           | 8279                            | 2816                           | 8375                            | 3038                           | 8495                            |
| 2835                           | 8260                            | 2826                           | 8342                            | 3036                           | 8498                            |
| 2828                           | 8273                            | 2793                           | 8412                            | 3004                           | 8491                            |
| 2795                           | 8289                            | 2790                           | 8394                            | 3017                           | 8529                            |
| 2788                           | 8299                            | 2722                           | 8407                            | 2977                           | 8505                            |
| 2740                           | 8302                            | 2704                           | 8431                            | 2951                           | 8534                            |
| 2741                           | 8292                            | 2681                           | 8435                            | 2903                           | 8561                            |
| 2683                           | 8304                            | 2698                           | 8429                            | 2892                           | 8565                            |
| 2702                           | 8313                            | 2655                           | 8441                            | 2832                           | 8590                            |
|                                |                                 | 2650                           | 8448                            | 2776                           | 8641                            |
|                                |                                 |                                |                                 | 2790                           | 8639                            |
